# Supplementary material
Source: PubMed Central journal article supplement (PMC6548614)

# SUPPLEMENTAL FIGURE 1

## WCDT

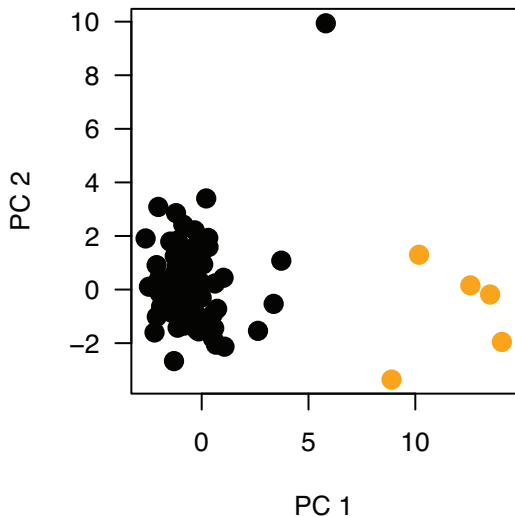

## Beltran

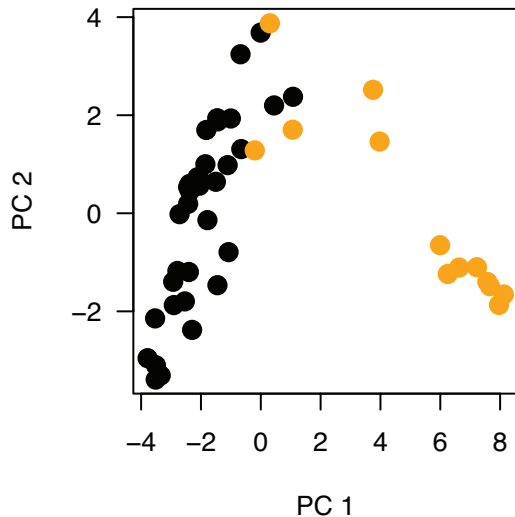

## WCDT baseline vs. progression

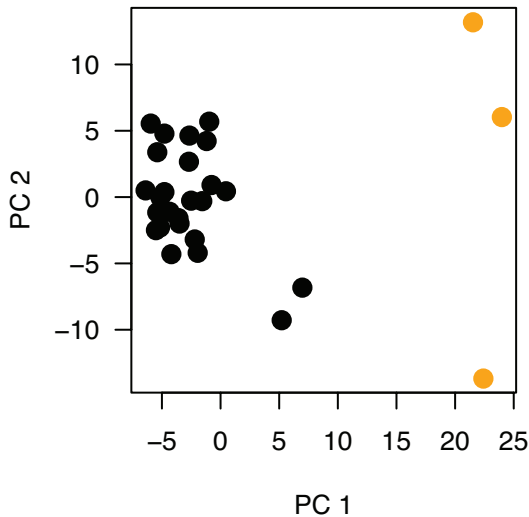

## Kumar

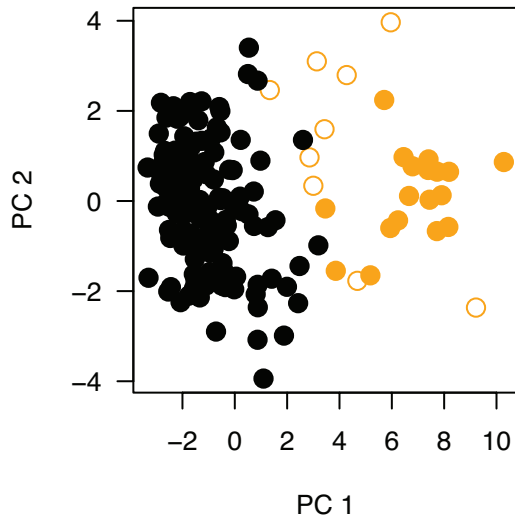

Supplement: NIHMS1525741-supplement-1.pdf [file NIHMS1525741-supplement-1.pdf]
